# Supplementary material for: An Approach to Function Annotation for Proteins of Unknown Function (PUFs) in the Transcriptome of Indian Mulberry
Source: PLoS One. 2016 Mar 16;11(3):e0151323. doi: 10.1371/journal.pone.0151323 (PMC4794119; doi:10.1371/journal.pone.0151323)
Supplement: S1 File — (XLSX) [file pone.0151323.s002.xlsx]

## Sheet: Primers
An approach to annotate PUFs identified from transcriptome of Indian mulberry
K. H. Dhanyalakshmi1, Mahantesha B. N. Naika1,2, R. S. Sajeevan1, Ramanathan Sowdhamini2* and Karaba N. Nataraja1*
1. Department of Crop Physiology, University of Agricultural Sciences, GKVK, Bangalore, 560065, India
2. National Centre for Biological Sciences, TIFR, GKVK campus, Bangalore, 560065, India
*Corresponding authors
nataraja_karaba@yahoo.com; nnkaraba@uasbangalore.edu.in (KNN)
mini@ncbs.res.in (RS)
Primers used for qRT-PCR experiment
	Sl No	PUFs	5' to 3'
	1	PUF1 (Forward)	GCCTGCAGATCACCAAGAAAGC
	2	PUF1 (Reverse)	CCGCATACACACAGTCCAATAGAC
	3	PUF2 (Forward)	GGGCTGCTCCTGCTCATCATGTG
	4	PUF2 (Reverse)	GAGCTCAAAAGGGAGCACGGTGAG
	5	PUF3 (Forward)	CATCGGCTCCAAGTGAGCAGC
	6	PUF3 (Reverse)	GGGTAAGTGTCCTACACTCGCCAC
	7	Elongation factor (Forward)	TCTCAAGCGTGGGTTTGTTGCT
	8	Elongation factor (Reverse)	TTGACAGCAATGTGGGAGGTGT
