# Supplementary material for: An Approach to Function Annotation for Proteins of Unknown Function (PUFs) in the Transcriptome of Indian Mulberry
Source: PLoS One. 2016 Mar 16;11(3):e0151323. doi: 10.1371/journal.pone.0151323 (PMC4794119; doi:10.1371/journal.pone.0151323)
Supplement: S3 File — (XLSX) [file pone.0151323.s004.xlsx]

## Sheet: Annotation of PUFs
An approach to annotate PUFs identified from transcriptome of Indian mulberry
K. H. Dhanyalakshmi1, Mahantesha B. N. Naika1,2, R. S. Sajeevan1, Ramanathan Sowdhamini2* and Karaba N. Nataraja1*
1. Department of Crop Physiology, University of Agricultural Sciences, GKVK, Bangalore, 560065, India
2. National Centre for Biological Sciences, TIFR, GKVK campus, Bangalore, 560065, India
*Corresponding authors
nataraja_karaba@yahoo.com; nnkaraba@uasbangalore.edu.in (KNN)
mini@ncbs.res.in (RS)
Function prediction of PUFs in mulberry, genotype Dudia white
Analysis of PUFs						Sequence based annotation				Fold based annotation
Serial No.	Contig id	PUF id	PUFs	Contig length	Fgenesh/Augustus	CDD	Evalue	Pfam	E value	3D PSSM	E value	Phyre2	Cofidence; Coverage of rsidues	genThreader	A
1	contig00286	PUF1	Unknown	673	199	Tryparedoxin like family	2.99e-55	Thioredoxin-like	4.3e-23	Class no tin SCOP1.53		Fold:Cysteine-rich domain	99.8%; 61%	Fold: Cysteine-rich domain	0.002
						C1-like domain	0.000137	c1 domain	1.1e-05	Structural genomics, unknown function.		Superfamily:Cysteine-rich domain		Superfamily: Cysteine-rich domain
												Family:C1-like domain		Family: C1-like domain
2	contig0529	PUF2	Unknown	667	221	ACT super family	8.32e-06	ACT domain	0.23	Fold: Formyltransferase	0.793	PDB header:transcription	99.9%; 67%	Fold: Ferredoxin-like	0.045
										Superfamily: Formyltransferase				Superfamily: ACT-like
										Family: Formyltransferase				Family: Glycine cleavage system transcriptional repressor
3	contig01194	PUF3	Unknown	729	166	Universal stress protein family.	1.96e-25	Universal stress protein family	8.9e-26	Fold: ETFP adenine nucleotide-binding domain-like	0.000313	Fold:Adenine nucleotide alpha hydrolase-like	99.6%; 86%	Fold: Adenine nucleotide alpha hydrolase-like	0.0002
										Superfamily: ETFP adenine nucleotide-binding domain-like		Superfamily:Adenine nucleotide alpha hydrolases-like		Superfamily: Adenine nucleotide alpha hydrolases-like
										Family: Hypothetical" protein MJ0577		Family:Universal stress protein-like		Family: Universal stress protein-like
4	contig01391	PUF4	Unknown	1334	349	Ankyrin repeats	3.83e-33	Ank_2 (Ankyrin repeats)	1.3e-15	Structural protein; ankyrin	0.00503	Fold:beta-hairpin-alpha-hairpin repeat	100%; 43%	Fold: Artificial ankyrin repeat proteins	2e-07
										Ankyrin		Superfamily:Ankyrin repeat		Superfamily: Artificial ankyrin repeat proteins
												Family:Ankyrin repeat		Family: Artificial ankyrin repeat proteins
5	contig01796	PUF5	Unknown	714	88	No hits		No hits		Transcription	20.8	PDB header:transferase	36.5%, 23%	Fold: SH3-like barrel	0.224
														Superfamily: Plus3-like
														Family: Plus3
6	contig01963	PUF6	Unknown	1215	396	CBS pair	2.06e-58	CBS Domain	2.3e-08	Conserved hypothetical protein ta0289 of unknown function	1.66e-08	PDB header:transferase/protein binding	100% ; 69%	Fold: CBS-domain pair	8e-06
														Superfamily: CBS-domain pair
														Family: CBS-domain pair
7	contig02017	PUF7	Unknown	893	238	Chaperonin_like super family	3.33e-146	TCP-1/cpn60 chaperonin family	2.1e-62	GroEL-like chaperones, ATPase domain	1.91e-05	PDB header:chaperone	100%; 81%	Fold: GroEL equatorial domain-like	6e-05
														Superfamily: GroEL equatorial domain-like
														Family: Group II chaperonin (CCT, TRIC), ATPase domain
8	contig02101	PUF8	Unknown	653	72	SRPBCC super family	1.34e-06	No hits		Fold: Uteroglobin-like	8.22	Fold:FAD-linked reductases, C-terminal domain	20.2%; 60%	Fold: RelE-like	0.433
										Superfamily: Uteroglobin-like		Superfamily:FAD-linked reductases, C-terminal domain		Superfamily: : RelE-like
										Family: Uteroglobin-like		Family:GMC oxidoreductases		Family: YoeB/Txe-like
9	contig02328	PUF9	Unknown	1017	260	RRM_SF super family, RNA recognition motif (RRM) superfamily	5.46e-15	RRM_5(RNA recognition motif. (a.k.a. RRM, RBD, or RNP domain)	4e-06	Retrovirus zinc finger-like domains	5.11e-07	PDB header:splicing	99.2% ; 15%	Fold: Ferredoxin-like	0.002
						DUF1777	1.53e-12	zf-CCHC(Zinc knuckle)	2.4e-05					Superfamily: RNA-binding domain, RBD
						Zinc finger	4.56e-05	zf-CCHC(Zinc knuckle)	5.4e-05					Family: Canonical RBD
10	contig02670	PUF10	Unknown	662	154	Aldo_ket_red super family	1.58e-18	Aldo/keto reductase family	6.1e-18	TIM beta/alpha-barrel	0.0532	Fold:TIM beta/alpha-barrel	99.6%; 80%	Fold: TIM beta/alpha-barrel	0.0009
												Superfamily:NAD(P)-linked oxidoreductase		Superfamily: NAD(P)-linked oxidoreductase
												Family:Aldo-keto reductases (NADP)		Family: Aldo-keto reductases (NADP)
11	contig04385	PUF11	Unknown	2762	712	Major intrinsic protein (MIP) superfamily	5.23e-89	MIP (Major Intrinsic protein)	4.5e-82	Fold: PLP-dependent transferases	0.346	Fold:Flavodoxin-like	94.3%; 13%	Fold: N domain of copper amine oxidase-like	0.145
						Oligosaccharyltransferase 48 kDa subunit beta	2.84e-148	DDOST_48kD(Oligosaccharyltransferase 48 kDa subunit beta)	1.9e-125	Superfamily: PLP-dependent transferases		Superfamily:Class I glutamine amidotransferase-like		Superfamily: Frataxin/Nqo15-like
												Family:ThuA-like		Family: Frataxin-like
12	contig04437	PUF12	Unknown	2539	746	Thiamine pyrophosphate (TPP) family, Transketolase (TK) subfamily, TPP-binding module	4.77e-139	Transketolase_N(Transketolase, thiamine diphosphate binding domain)	1.1e-148	Transketolase	5.27e-07	PDB header:transferase	100%; 89%	Fold: Thiamin diphosphate-binding fold	4e-27
						Pyrimidine (PYR) binding domain of 1-deoxy-D-xylulose-5-phosphate synthase (DXS)	1.2e-55	Transket_pyr (Transketolase, pyrimidine binding domain)	2e-43			Chain: C: PDB Molecule:transketolase		Superfamily: Thiamin diphosphate-binding fold
														Family: TK-like Pyr module
13	contig04699	PUF13	Unknown	1975	498	GDP-fucose protein O-fucosyltransferase, plant specific subfamily	8.19e-144	O-FucT(GDP-fucose protein O-fucosyltransferase)	6.5e-86	NOT in SCOP 1.53		PDB header:transferase	100% ;73%	Fold: TIM beta/alpha-barrel	0.116
						GDP-fucose protein O-fucosyltransferase	5.39e-102					Chain: A: PDB Molecule:putative gdp-fucose protein o-fucosyltransferase 1;		Superfamily: Xylose isomerase-like
														Family: Hypothetical protein YgbM
14	contig04820	PUF14	Unknown	1841	546	Plant aldehyde dehydrogenase family 3 members F1, H1, and I1 and related proteins	0	Aldedh (Aldehyde dehydrogenase family)	2e-85	Fold: Aldehyde reductase (dehydrogenase), ALDH	0.000108	PDB header:oxidoreductase	100%; 89%	Fold: ALDH-like	6e-14
						Aldehyde dehydrogenase family protein	0			Superfamily: Aldehyde reductase (dehydrogenase), ALDH		Chain: A: PDB Molecule:proline dehydrogenase/delta-1-pyrroline-5-carboxylate		Superfamily: ALDH-like
										Family: Aldehyde reductase (dehydrogenase), ALDH				Family: ALDH-like
15	contig04823	PUF15	Unknown	1840	569	GDP-fucose protein O-fucosyltransferase and related proteins	5.7e-07	No matches		Fold: alpha/beta-Hydrolases	0.809	PDB header:transferase	100%; 59%	Fold: SufE/NifU	0.01
										Superfamily: alpha/beta-Hydrolases		Chain: X: PDB Molecule:alpha-(1,6)-fucosyltransferase		Superfamily: SufE/NifU
										Family: Epoxide hydrolase				Family: SP1160 C-terminal domain-like
16	contig04921	PUF16	Unknown	1753	477	Zinc finger	1.32e-06	zf-CCCH (Zinc finger C-x8-C-x5-C-x3-H type)	1.2e-05	Structural protein; ankyrin	0.00523	PDB header:structural protein	100%; 37%	Fold: Artificial ankyrin repeat proteins	0.0002
						Cobalt transport protein;	0.000497	Ank_2 (Ankyrin repeats (3 copies)	1.9e-11			Chain: A: PDB Molecule:ankyrin		Superfamily: Artificial ankyrin repeat proteins
						Ankyrin repeats	2.12e-12							Family: Artificial ankyrin repeat proteins
17	contig05125	PUF17	Unknown	1628	466	DUF454	0.00016	DUF2363 (Domain of unknown function)	9.4e-54	Fold: alpha-alpha superhelix	0.0509	Fold:Nuclear receptor coactivator interlocking domain	59.3% ;6%	Fold: DNA/RNA-binding 3-helical bundle	0.012
						DUF2363 Uncharacterized conserved protein	1.1e-69			Superfamily: ARM repeat		Superfamily:Nuclear receptor coactivator interlocking domain		Superfamily: "Winged helix" DNA-binding domain
										Family: Armadillo repeat		Family:Nuclear receptor coactivator interlocking domain		Family: C-terminal fragment of elongation factor SelB
18	contig5180	PUF18	Unknown	1592	431	PHA03307, transcriptional regulator ICP4	0.000111	E1_dh(Dehydrogenase E1 component)	5.1e-98	not in SCOP 1.53		Fold:Thiamin diphosphate-binding fold (THDP-binding)	100%;81%	Fold: Thiamin diphosphate-binding fold (THDP-binding)	9e-12
						Thiamine pyrophosphate (TPP) family, E1 of PDC_ADC_BCADC subfamily, TPP-binding module	6.46e-149					Superfamily:Thiamin diphosphate-binding fold (THDP-binding)		Superfamily: Thiamin diphosphate-binding fold (THDP-binding)
												Family:Branched-chain alpha-keto acid dehydrogenase PP module		Family: Branched-chain alpha-keto acid dehydrogenase Pyr module
19	contig05224	PUF19	Unknown	1565	393	Serine/threonine phosphatases, family 2C, catalytic domain	1.55e-62	PP2C (Protein phosphatase 2C)	2e-43	Fold: Protein serine/threonine phosphatase 2C	3.78e-46	PDB header:hydrolase	100%; 74%	Fold: PP2C-like	2e-05
						PP2C; Protein phosphatase 2C	3.27e-41			Superfamily: Protein serine/threonine phosphatase 2C		Chain: A: PDB Molecule:[pyruvate dehydrogenase [lipoamide]]-phosphatase		Superfamily: PP2C-like
										Family: Protein serine/threonine phosphatase 2C				Family: PP2C-like
20	contig05261	PUF20	Unknown	1553	404	Protamine_P1[pfam00260], Protamine P1	0.000902	DUF1517 (Domain of unknown function)	3.2e-97	Fold: Alpha and beta proteins (a+b)	0.319	Fold:Common fold of diphtheria toxin/transcription factors/cytochrome f	26.9%; 11%	Fold: Ntn hydrolase-like	0.058
						Protein of unknown function (DUF1517)	1.3e-121			Superfamily: Zincin-like		Superfamily:p53-like transcription factors		Superfamily: N-terminal nucleophile aminohydrolases
						Mating_C super family, C-terminal domain of homeodomain 1	1.02e-05			Family: Metalloproteases ("zincins"), catalytic domain		Family:STAT DNA-binding domain		Family: Proteasome subunits
21	contig05320	PUF21	Unknown	1521	386	D-glycerate dehydrogenase/hydroxypyruvate reductase (GDH)	2.07e-132	2-Hacid_dh 9 (D-isomer specific 2-hydroxyacid dehydrogenase)	6.9e-18	not in SCOP 1.53		PDB header:oxidoreductase	100%; 88%	Fold: NAD(P)-binding Rossmann-fold domains	1e-07
												Chain: A: PDB Molecule:d-3-phosphoglycerate dehydrogenase;		Superfamily: NAD(P)-binding Rossmann-fold domains
														Family: Formate/glycerate dehydrogenases, NAD-domain
22	contig05347	PUF22	Unknown	1513	401	Aerobic Cyclase System Fe-containing subunit (ACSF), ferritin-like diiron-binding domain	0	Rubrerythrin (Rubrerythrin)	3.1e-40	Fold: Ferritin-like	0.251	Fold:Ferritin-like	99%; 33%	Fold: Nucleotide-diphospho-sugar transferases	0.003
										Superfamily: Ferritin-like		Superfamily:Ferritin-like		Superfamily: Nucleotide-diphospho-sugar transferases
										Family: Ribonucleotide reductase-like		Family:Ferritin		Family: UDP-glucose pyrophosphorylase
23	contig05421	PUF23	Unknown	1478	380	DR_a1, a typical (a) SDRs, subgroup 1	2.25e-96	NAD_binding_10(NADH(P)-binding)	1.1e-14	Fold: NAD(P)-binding Rossmann-fold domains	4.38e-06	PDB header:hydrolase	100%; 83%	Fold: NAD(P)-binding Rossmann-fold domains	5e-07
										Superfamily: NAD(P)-binding Rossmann-fold domains		Chain: C: PDB Molecule:protein arna		Superfamily: NAD(P)-binding Rossmann-fold domains
										Family: homol. to d1bxka		PDBTitle: crystal structure of full length arna		Family: Tyrosine-dependent oxidoreductases
24	contig05454	PUF24	Unknown	1469	323	Water Stress and Hypersensitive response	1.92e-20	LEA_2 (Late embryogenesis abundant protein)	3.9e-16	Actin binding protein.	0.679	PDB header:structural genomics, unknown function	100% ; 51%	Fold: Immunoglobulin-like beta-sandwich	7e-07
						Late embryogenesis abundant protein	5.47e-16	LEA_2 (Late embryogenesis abundant protein)	8.6e-13	Gelation factor				Superfamily: LEA14-like
														Family: LEA14-like
25	contig05496	PUF25	Unknown	1445	372	GDSL/SGNH-like Acyl-Esterase family found in Pmr5 and Cas1p	3e-113	PMR5N (PMR5 N terminal Domain)	5.2e-21	Fold: alpha/beta-Hydrolases	0.15	PDB header:hydrolase	92.7%; 47%	Fold: alpha/beta-Hydrolases	0.072
						PMR5 N terminal Domain	4.82e-26	PC-Esterase (GDSL/SGNH-like Acyl-Esterase family)	9.8e-75	Superfamily: alpha/beta-Hydrolases		Chain: A: PDB Molecule:putative acetyl xylan esterase;		Superfamily: alpha/beta-Hydrolases
										Family: Carboxylesterase				Family: Gastric lipase
26	contig05505	PUF26	Unknown	1441	376	Saccharomyces cerevisiae DCR2 phosphatase and related proteins, metallophosphatase domain	4.16e-44	Metallophos (Calcineurin-like phosphoesterase)	3.6e-10	Fold: Metallo-dependent phosphatases	0.00986	Fold:Metallo-dependent phosphatases	99.9%; 81%	Fold: Metallo-dependent phosphatases	0.009
						Calcineurin-like phosphoesterase	5.85e-11			Superfamily: Metallo-dependent phosphatases		Superfamily:Metallo-dependent phosphatases		Superfamily: Metallo-dependent phosphatases
										Family: Purple acid phosphatase		Family:ADPRibase-Mn-like		Family: Purple acid phosphatase-like
27	contig05537	PUF27	Unknown	1423	362	Ubiquitin	1.87e-47	ubiquitin (Ubiquitin family)	3.4e-17	Fold:beta-Grasp (ubiquitin-like)	0.000674	PDB header:signaling protein	100%; 41%	Fold: beta-Grasp (ubiquitin-like)	1e-06
										Superfamily: Ubiquitin-related		Chain: A: PDB Molecule:interferon, alpha-inducible protein		Superfamily: Ubiquitin-like
										Family: Ubiquitin-related				Family: Ubiquitin-related
28	contig05592	PUF28	Unknown	1400	346	Putative D-isomer specific 2-hydroxyacid dehydrogenases, NAD-binding and catalytic domains	3.62e-113	2-Hacid_dh(D-isomer specific 2-hydroxyacid dehydrogenase, catalytic domain)	2.4e-15	not in SCOP 1.53	0.00755	PDB header:oxidoreductase	100%; 89%	Fold: NAD(P)-binding Rossmann-fold domains	7e-08
								2-Hacid_dh(D-isomer specific 2-hydroxyacid dehydrogenase, NAD binding domain)	4.9e-44			Chain: A: PDB Molecule:d-3-phosphoglycerate dehydrogenase		Superfamily: NAD(P)-binding Rossmann-fold domains
														Family: Formate/glycerate dehydrogenases, NAD-domain
29	contig05650	PUF29	Unknown	1380	341	ATP synthase I chain	1.57e-06	no hits		Fold: Chorismate mutase II	1.3	PDB header:immune system/viral protein	51.2% ; 4 %	Fold: Flavodoxin-like	0.073
										Superfamily: Chorismate mutase II		Chain: B: PDB Molecule:killer cell lectin-like receptor 8		Superfamily: SGNH hydrolase
										Family: Allosteric chorismate mutase				Family: Acetylhydrolase
30	contig05740	PUF30	Unknown	1343	366	Aspartate aminotransferase family	6.58e-36	Aminotran_1_2(Aminotransferase class I and II)	1.3e-24	Fold: PLP-dependent transferases	1.94e-08	PDB header:transferase	100%; 97%	Fold: PLP-dependent transferase-like	4e-11
						Aspartate aminotransferase family	3.78e-33	Aminotran_1_2(Aminotransferase class I and II)	1e-19	Family: PLP-dependent transferases				Superfamily: PLP-dependent transferases
										Superfamily: homol. to d1bjwa_				Family: AAT-like
31	contig05864	PUF31	Unknown	1303	336	Mpr1p, Pad1p N-terminal (MPN) domains without catalytic isopeptidase activity	1.73e-155	JAB (JAB1/Mov34/MPN/PAD-1 ubiquitin protease)	1.4e-14	Transferase	0.673	PDB header:hydrolase	100%; 59%	Fold: alpha-alpha superhelix	0.034
												Chain: B: PDB Molecule:cop9 signalosome complex subunit 5		Superfamily: ARM repeat
														Family: Diap1 N-terninal region-like
32	contig05991	PUF32	Unknown	1264	311	Sperm histone P2	0.000795	no hits		Fold: All alpha proteins	1.66e-08	PDB header:transferase	99.9%; 56%	Fold: TPR domain-based design	0.008
						PHA01732 super family, proline-rich protein	3.14e-06			Superfamily: alpha-alpha superhelix				Superfamily: TPR domain-based design]
						Tetratricopeptide repeat domain	7.5e-06			Family: Tetratricopeptide repeat (TPR)				Family: TPR domain-based design
33	contig06030	PUF33	Unknown	1252	313	Sulfite exporter TauE/SafE	3.4e-12	Sulfite exporter TauE/SafE	3.4e-12	Fold: Membrane all-alpha	0.114	PDB header:transport protein	51.8%; 42%	Fold: GroES-like	0.034
										Superfamily: Membrane all-alpha		Chain: H: PDB Molecule:nitrite transporter nirc;		Superfamily: GroES-like
										Family: Membrane all-alpha		PDBTitle: fnt family ion channel		Family: Alcohol dehydrogenase-like, N-terminal domain
34	contig06333	PUF34	Unknown	1160	272	Chlorophyll A-B binding protein	1.34e-127	Chloro a_b-bind(Chlorophyll A-B binding protein)	2.6e-51	not in SCOP 1.53		Fold:Chlorophyll a-b binding protein	100%; 77%	Fold: Common fold of diphtheria toxin/transcription factors/cytochrome f	0.1
						light-harvesting complex I chlorophyll-a/b binding protein Lhca5	1.34e-77					Superfamily:Chlorophyll a-b binding protein		Superfamily: p53-like transcription factors
												Family:Chlorophyll a-b binding protein		Family: Rel/Dorsal transcription factors, DNA-binding domain
35	contig06433	PUF35	Unknown	1134	257	Transcriptional regulator ICP4	1.71e-08	Chloro a_b-bind(Chlorophyll A-B binding protein)	9.2e-45	not in SCOP 1.53		Fold:Chlorophyll a-b binding protein	100%; 67%	Fold: L-sulfolactate dehydrogenase-like	0.116
						Photosystem II light-harvesting-Chl-binding protein Lhcb6 (CP24)	0					Superfamily:Chlorophyll a-b binding protein		Superfamily: L-sulfolactate dehydrogenase-like
						DUF566 super family	0.000319					Family:Chlorophyll a-b binding protein		Family: L-sulfolactate dehydrogenase-like
36	contig06595	PUF36	Unknown	1095	254	Triosephosphate isomerase (TIM)	1.59e-129	TIM(Triosephosphate isomerase)	4.2e-87	Fold: IM beta/alpha-barrel	4.62e-06	Fold:TIM beta/alpha-barrel	100%;98%	Fold: TIM beta/alpha-barrel	1e-13
										Superfamily: Triosephosphate isomerase (TIM)		Superfamily:Triosephosphate isomerase (TIM)		Superfamily: Triosephosphate isomerase (TIM)
										Family: Triosephosphate isomerase (TIM)		Family:Triosephosphate isomerase (TIM)		Family: Triosephosphate isomerase (TIM)
37	contig06596	PUF37	Unknown	1097	200	Rab5_related[cd01860], Rab-related GTPase family includes Rab5 and Rab22	1.71e-111	Ras (Ras family)	2.6e-59	Fold: P-loop containing nucleotide triphosphate hydrolases	6.38e-05	Fold:P-loop containing nucleoside triphosphate hydrolases	100%; 95%	Fold: P-loop containing nucleoside triphosphate hydrolases	3e-07
										Superfamily: P-loop containing nucleotide triphosphate hydrolases		Superfamily:P-loop containing nucleoside triphosphate hydrolase		Superfamily: P-loop containing nucleoside triphosphate hydrolases
										Family: homol. to d3raba_		Family: G proteins		Family: G proteins
38	contig06640	PUF38	Unknown	1082	248	Phosphoglucomutase 3	4.87e-98	Phosphoglucomutase/phosphomannomutase	4e-11	Fold: PH domain-lik	0.953	PDB header:isomerase	100%; 95%	Fold: Phosphoglucomutase, first 3 domains	0.005
										Superfamily: PH domain-like		Chain: B: PDB Molecule:n-acetylglucosamine-phosphate mutase;		Superfamily: Phosphoglucomutase, first 3 domains
										Family: Pleckstrin-homology domain (PH domain)				Family: Phosphoglucomutase, first 3 domains
39	contig06735	PUF39	Unknown	1068	191	PLATZ transcription factor; Plant AT-rich sequence and zinc-binding proteins	5.46e-48	PLATZ (PLATZ transcription factor)	8.5e-40	Fold: Immunoglobulin-like beta-sandwich	2.22	PDB header:gene regulation, hydrolase	80.1% ; 19%	Fold: DNA clamp	0.188
										Superfamily: Immunoglobulin		Chain: A: PDB Molecule:probable atp-dependent rna helicase ddx59;		Superfamily: DNA clamp
										Family: C1 set domains (antibody constant domain-like)				Family: DNA polymerase processivity factor
40	contig06750	PUF40	Unknown	1066	232	Elongation factor 1 beta (EF1B) guanine nucleotide exchange domain	9.05e-38	EF-1 guanine nucleotide exchange domain	1.3e-30	Fold: Ferredoxin-like	1.89e-08	Fold:Ferredoxin-like	100%; 39%	Fold: Reductase/isomerase/elongation factor common domain	1e-06
										Superfamily: Guanine nucleotide exchange factor domain from elongation factor-1 beta		Superfamily:eEF-1beta-like		Superfamily: Translation proteins
										Family: Guanine nucleotide exchange factor domain from elongation factor-1 beta		Family:eEF-1beta-like		Family: Elongation factors
41	contig06773	PUF41	Unknown	1058	152	Catalytic domain of Protein Kinases; Protein Kinases (PKs), catalytic (c) domain.	1.53e-08	Pkinase (Protein kinase domain)	5.4e-05	structural protein	1.47	PDB header:transferase	99.8%; 78%	Fold: Protein kinase-like (PK-like)	0.001
										nucleolin rbd1		Chain: A: PDB Molecule:dual specificity tyrosine-phosphorylation-regulated kinase		Superfamily: Protein kinase-like (PK-like)
														Superfamily: Protein kinase-like (PK-like)
42	contig06932	PUF42	Unknown	1022	251	RNA recognition motif	2.12e-33	RRM_1 (RNA recognition motif)	4.5e-10	not in SCOP 1.53		PDB header:rna binding protein	99.8%; 56 %	Fold: Ferredoxin-like	0.01
												Chain: B: PDB Molecule:non-pou domain-containing octamer-binding protein		Superfamily: RNA-binding domain, RBD
														Family: Canonical RBD
43	contig07040	PUF43	Unknown	1000	148	No Conserved Domains		No Hits		Class not in SCOP 1.53	3.27	Fold:lambda repressor-like DNA-binding domains	49.4%; 12%	Fold: Immunoglobulin-like beta-sandwich	0.769
										hydrolase		Superfamily:lambda repressor-like DNA-binding domains		Superfamily: Immunoglobulin
										endoglucanase		Family:Bacteriophage CII protein
44	contig07145	PUF44	Unknown	980	216	Rab GTPase families	5.39e-124	Ras family	8.7e-66	Alpha and beta proteins (a/b)	0.000343	P-loop containing nucleoside triphosphate hydrolases	100%; 88%	Fold: FAD/NAD(P)-binding domain	9e-08
										P-loop containing nucleotide triphosphate hydrolases		P-loop containing nucleoside triphosphate hydrolases		Superfamily: FAD/NAD(P)-binding domain
												G proteins		Family: GDI-like N domain
45	contig07540	PUF45	Unknown	908	155	Dormancy/auxin associated protein	1.57e-63	Dormancy/auxin associated protein	6.5e-48	Small proteins	8.24	Transcription regulator/protein binding	47.6%; 19%	Fold: Cystatin-like	0.319
										Kringle-like				Superfamily: NTF2-like
														Family: NTF2-like
46	contig07570	PUF46	Unknown	899	217	Rab11 like	4.84e-126	Ras family	1.6e-61	P-loop containing nucleotide triphosphate hydrolases	6.38e-05	P-loop containing nucleoside triphosphate hydrolases	100%;87%	Fold: P-loop containing nucleoside triphosphate hydrolases	8e-08
												P-loop containing nucleoside triphosphate hydrolases		Superfamily: P-loop containing nucleoside triphosphate hydrolases
												G proteins		Family: G proteins
47	contig07599	PUF47	Unknown	894	199	Cyt cOxidase	8e-46	Cytochrome oxidase c subunit Vib	1.5e-17	Fold: Cytochrome c oxidase subunit h	2.12e-07	Cytochrome c oxidase subunit h	100%, 38%	Fold: Synuclein	0.272
										Superfamily: Cytochrome c oxidase subunit h		Cytochrome c oxidase subunit h		Superfamily: Synuclein
										Family: Cytochrome c oxidase subunit h		Cytochrome c oxidase subunit h		Family: Synuclein
48	contig07639	PUF48	Unknown	889	234	No hits		No hits		Fold: alpha-alpha superhelix	0.643	PDB header:hydrolase, protein binding	99.7%; 72%	Fold: alpha-alpha superhelix	0.045
										Superfamily: Tetratricopeptide repeat (TPR)		Chain: A: PDB Molecule:26s proteasome regulatory complex subunit p42b;		Superfamily: TPR-like
										Family: homol. to d1elra_				Family: Transcription factor MalT domain III
49	contig07777	PUF49	Unknown	866	166	DUF866	4.55e-74	DUF866 (Domain of unknown function)	5.6e-56	Metal binding protein.	2.27	Fold:MAL13P1.257-like	100%; 92 %	Fold: MAL13P1.257-like	4e-08
										Guanine nucleotide exchange factor;.		Superfamily:MAL13P1.257-like		Superfamily: MAL13P1.257-like
												Family:MAL13P1.257-like		Family: MAL13P1.257-like
50	contig08042	PUF50	Unknown	825	154	Aldolase_Class_I super family	8.33e-09	Fructose-bisphosphate aldolase class-I	1.2e-12	Fold: TIM beta/alpha-barrel	3.7e-06	Fold:TIM beta/alpha-barrel	100%; 100%	Fold: TIM beta/alpha-barrel	2e-05
										Superfamily: Aldolase		Superfamily:Aldolase		Superfamily: Aldolase
										Family: Class I aldolase		Family:Class I aldolase		Family: Class I aldolase
51	contig08184	PUF51	Unknown	805	153	Protein of unknown function (DUF1777)	0.000823	Ubiquitin-conjugating	1.3e-47	Fold: Ubiquitin conjugating enzyme	3.75e-08	PDB header:hydrolase/ligase	100%; 97%	Fold: UBC-like	5e-07
						Ubiquitin-conjugating enzyme E2, catalytic (UBCc) domain	2.64e-63			Superfamily: Ubiquitin conjugating enzyme		Chain: B: PDB Molecule:ubiquitin-conjugating enzyme e2 d2, ubiquitin thioesterase		Superfamily: UBC-like
										Family: Ubiquitin conjugating enzyme				Family: UBC-related
52	contig08330	PUF52	Unknown	783	171	Rab11 likeRab GTPase family 11	1.08e-99	Ras (Ras family)	3.8e-51	Fold: P-loop containing nucleotide triphosphate hydrolase	6.38e-05	Fold:P-loop containing nucleoside triphosphate hydrolases	100%; 95%	Fold: P-loop containing nucleoside triphosphate hydrolases	3e-05
							1.58e-07			Superfamily: P-loop containing nucleotide triphosphate hydrolases		Superfamily:P-loop containing nucleoside triphosphate hydrolases		Superfamily: P-loop containing nucleoside triphosphate hydrolases
										homol. to d3raba_		Family:G proteins		Family: G proteins
53	contig08474	PUF53	Unknown	761	222	60S ribosomal protein L15	3.52e-150	Ribosomal L15e	8e-98	Ribosomal protein rpl15	1.38e-06	PDB header:ribosome	100%; 100%	Fold: Long alpha-hairpin	6e-15
												Chain: Q: PDB Molecule:ribosomal protein l15		Superfamily: Ribosomal protein L29
														Family: Ribosomal protein L29
54	contig08640	PUF54	Unknown	737	219	Hydrolase 4 super family, Putative lysophospholipase	0.00064	Alpha/beta hydrolase family	2e-23	Fold: alpha/beta-Hydrolases	0.028	PDB header:hydrolase	100%; 66%	Fold: alpha/beta-Hydrolases	3e-06
										Superfamily: alpha/beta-Hydrolases		Chain: A: PDB Molecule:epoxide hydrolase;		Superfamily: alpha/beta-Hydrolases
										Family: Haloalkane dehalogenase				Family: Carbon-carbon bond hydrolase
55	contig08772	PUF55	Unknown	720	173	Iron-sulfur cluster assembly accessory protein	8.57e-50	Iron-sulphur cluster biosynthesis	6.3e-20	Metal transport	1.98e-12	PDB header:metal transport	100%; 65%	Fold: HesB-like domain	5e-05
												Chain: A: PDB Molecule:sufa protein		Superfamily: HesB-like domain
														Family: HesB-like domain
56	contig08856	PUF56	Unknown	709	174	PP2 super family, Phloem protein 2	1.06e-15	PP2 (Phloem protein 2)	5.2e-18	Fold: Immunoglobulin-like beta-sandwich	5.09	Fold:Galactose-binding domain-like	84.2%; 52%	Fold: GatB/YqeY motif	0.224
										Superfamily: Immunoglobulin		Superfamily:Galactose-binding domain-like		Superfamily: GatB/YqeY motif
										Family: V set domains (antibody variable domain-like)		Family:CBM22		Family: GatB/GatE C-terminal domain-like
57	contig08939	PUF57	Unknown	690	122	Ubiquinol-cytochrome C reductase complex 14kD subunit	4.68e-32	Ubiquinol-cytochrome C reductase complex 14kD subunit	3.2e-26	Ubiquinol-cytochrome c reductase complex	0.014	Fold:14 kDa protein of cytochrome bc1 complex	100%; 85%	Fold: Cytochrome c	1e-05
												Superfamily:14 kDa protein of cytochrome bc1 complex		Superfamily: Cytochrome c
												Family:14 kDa protein of cytochrome bc1 complex		Family: Cytochrome bc1 domain
58	contig09315	PUF58	Unknown	647	131	Haloalkane dehalogenase	1.8e-06	no significant hits		Fold: alpha-Amylases, C-terminal beta-sheet domain	5.4	Fold:alpha/beta-Hydrolases	16.2%; 13%	Fold: SH3-like barrel	0.635
										Superfamily: alpha-Amylases, C-terminal beta-sheet domain		Superfamily:alpha/beta-Hydrolases		Superfamily: SH3-domain
										Family: alpha-Amylases, C-terminal beta-sheet domain		Family:Serine carboxypeptidase-like		Family: SH3-domain
59	contig09355	PUF59	Unknown	641	112	60S ribosomal protein L34	2.21e-71	SUI1 (Translation initiation factor SUI1)	5.1e-26	Fold: eIF1-like	1.66e-08	Fold:eIF1-like	100%; 97%	Fold: eIF1-like	1e-06
										Superfamily: eIF1-like		Superfamily:eIF1-like		Superfamily: eIF1-like
										Family: eIF1-like		Family:eIF1-like		Family: eIF1-like
60	contig09421	PUF60	Unknown	635	120	60S ribosomal protein L34	1.92e-74	Ribosomal protein L34e	6.7e-36	Ribosomal protein l44e	1.18	PDB header:ribosome	100%; 98%	Ribosomal protein S5 domain 2-like	0.186
												Chain: I: PDB Molecule:60s ribosomal protein l10 (l10e)		Superfamily: Ribosomal protein S5 domain 2-like
														Family: DNA gyrase/MutL, second domain
61	contig00062	PUF61	Hypothetical	592	156	Metallothionein	6.71e-10	No hits		not in SCOP 1.53		PDB header:hydrolase/viral protein	24.3%; 28%	Fold: alpha/beta-Hydrolases	0.219
												Chain: E: PDB Molecule:spike glycoprotein;		Superfamily: alpha/beta-Hydrolases
												PDBTitle: crystal structure of spike protein receptor-binding domain from a2 predicted sars coronavirus human strain complexed with human receptor3 ace2		Family: Thioesterase domain of polypeptide, polyketide and fatty acid synthases
62	contig00117	PUF62	Hypothetical	972	184	No Hits		No Hits		PDB header:hydrolase(serine protease).	3.23	PDB header:ligase	17.2%; 34%	Fold: Knottins (small inhibitors, toxins, lectins)	0.149
										Chain:A;: PDB Molecule:prothrombin fragment 1; .		Chain: A: PDB Molecule:ubiquitin-conjugating enzyme e2, putative;		Superfamily: omega toxin-like
										PDBTitle: the ca+2 ion and membrane binding structure of the gla domain of ca-2 prothrombin fragment 1		PDBTitle: crystal structure of ubiquitin conjugating enzyme e2, putative, from2 plasmodium falciparum		Family: Conotoxin
63	contig00355	PUF63	Hypothetical	912	94	nucellin_like	1.62e-104	TAXi_N (Xylanase inhibitor N-terminal)	9e-23	Fold: Acid proteases	0.0385	Fold:Acid proteases	99.6%; 77%	Fold: Acid proteases	0.2
								TAXi_C (Xylanase inhibitor C-terminal)	7.5e-10	Superfamily: Acid proteases		Superfamily:Acid proteases		Superfamily: Acid proteases
										Family: homol. to d1qdma2		Family:Pepsin-like		Family: Pepsin-like
64	contig00546	PUF64	Hypothetical	1101	321	Mlo super family	2.14e-139	Mlo family	7.3e-105	Cell cycle	1.13	PDB header:oxidoreductase	35.6%; 17%	Fold: TIM beta/alpha-barrel	0.022
										g2/mitotic-specific cyclin a;.		Chain: I: PDB Molecule:pmob;		Superfamily: Ribulose-phoshate binding barrel
												PDBTitle: crystal structure of particulate methane monooxygenase (pmmo) from2 methylocystis sp. strain m		Family: D-ribulose-5-phosphate 3-epimerase
65	contig00754	PUF65	Hypothetical	507	167	Calcium-binding EGF-like domain	1.16e-09	Calcium-binding EGF domain	6.9e-05	Structural protein	7.42e-05	PDB header:structural protein	99.4%; 49%	Fold: Knottins (small inhibitors, toxins, lectins)	0.056
										Fibrillin1		Chain: A: PDB Molecule:fibrillin 1;		Superfamily: EGF/Laminin
												PDBTitle: nmr study of the fibrillin-1 cbegf12-13 pair of ca2+2 binding epidermal growth factor-like domains		Family: EGF-type module
66	contig01002	PUF66	Hypothetical	1007	322	No hits		Late embryogenesis abundant protein	1.7e-08	Fold: Probable bacterial effector-binding domain	1.32	PDB header:structural genomics, unknown function	98.6%; 36%	Fold: alpha/alpha toroid	0.071
										Superfamily: Probable bacterial effector-binding domain		Chain: A: PDB Molecule:putative late embryogenesis abundant protein;		Superfamily: Chondroitin AC/alginate lyase
										Family: Rob transcription factor, C-terminal domain		PDBTitle: solution structure of a putative late embryogenesis2 abundant (lea) protein at2g46140.1		Family: Hyaluronate lyase-like catalytic, N-terminal domain
67	contig01413	PUF67	Hypothetical	1297	287	Heavy-metal-associated domain (HMA)	8.37e-10	Heavy-metal-associated domain	6.5e-12	Ankyrin binding.	0.212	PDB header:virus	1.4%; 2%	Fold: P-loop containing nucleoside triphosphate hydrolases	0.015
												Chain: I: PDB Molecule:spike glycoprotein e1;		Superfamily: P-loop containing nucleoside triphosphate hydrolases
												PDBTitle: mapping the e2 glycoprotein of alphaviruses		Family: G proteins
68	contig01439	PUF68	Hypothetical	1042	239	No hits		No hits		Fold: Prealbumin-like	3.22	PDB header:chaperone	61.3%; 14%	Fold: Knottins (small inhibitors, toxins, lectins)	0.291
										Superfamily: Starch-binding domain		Chain: B: PDB Molecule:chaperone protein faee;		Superfamily: Satiety factor CART (cocaine and amphetamine regulated transcript)
										Family: Starch-binding domain		PDBTitle: structure of the semet labeled f4 fibrial chaperone faee		Family: Satiety factor CART
69	contig01662	PUF69	Hypothetical	2026	565	CASC3/Barentsz eIF4AIII binding	9.66e-25	CASC3/Barentsz eIF4AIII binding	4.9e-17	Fold: Viral coat and capsid proteins	0.156	PDB header:hydrolase/rna binding protein/rna	99.0%; 10%	Fold: PABP domain-like	0.158
										Superfamily: Viral coat and capsid proteins		Chain: I: PDB Molecule:protein casc3;		Superfamily: PABC (PABP) domain
										Family: Viral coat and capsid proteins		PDBTitle: the crystal structure of ejc in its transition state		Family: PABC (PABP) domain
70	contig01734	PUF70	Hypothetical	633	171	Leucine rich repeat	1.37e-08	Leucine rich repeat	1.7e-09	Inhibiotr	0.0399	PDB header:transferase/transferase receptor	100%; 82%	Fold: Leucine-rich repeat, LRR (right-handed beta-alpha superhelix)	9e-06
												Chain: A: PDB Molecule:lrr receptor-like serine/threonine-protein kinase fls2;		Superfamily: L domain-like
												PDBTitle: crystal structure of flg22 in complex with the fls2 and bak12 ectodomains		Family: Ngr ectodomain-like
71	contig01852	PUF71	Hypothetical	1585	302	Esterase lipase super family	0.000159	No hits		Fold: Multiheme cytochromes	2.15	PDB header:acyltransferase	30.7%; 3%	Fold: Fold: Glutaminase/Asparaginase	0.104
										Superfamily: Multiheme cytochromes		Chain: A: PDB Molecule:aminolevulinic acid synthase 2, erythroid;		Superfamily: Fold: Glutaminase/Asparaginase
										Family: Di-heme elbow motif		PDBTitle: solution structure of the 49 aa presequence of 5-alas		Family: Fold: Glutaminase/Asparaginase
72	contig01866	PUF72	Hypothetical	934	310	K homology RNA-binding domain, type I	4.61e-16	KH domain	1.1e-16	Fold: KH-domain	0.0443	PDB header:splicing	100%; 51%	Fold: Fold: Eukaryotic type KH-domain (KH-domain type I)	3e-05
						K homology RNA-binding domain, type I	2.05e-15	KH domain	3.1e-18	Superfamily: KH-domain		Chain: A: PDB Molecule:far upstream element-binding protein 2;		Superfamily: Fold: Eukaryotic type KH-domain (KH-domain type I)
										Family: KH-domain		PDBTitle: solution nmr structure of the second and third kh domains2 of ksrp		Family: Fold: Eukaryotic type KH-domain (KH-domain type I)
73	contig01896	PUF73	Hypothetical	1676	403	Catalytic domain of the Serine/Threonine kinases	1.55e-86	Protein tyrosine kinase	7.6e-45	Fold: Protein kinase-like (PK-like)	0.803	PDB header:transferase	100%; 64%	Fold: Fold: immunoglobulin/albumin-binding domain-like	2e-17
										Superfamily: Protein kinase-like (PK-like)		Chain: A: PDB Molecule:proto-oncogene tyrosine-protein kinase abl1 (1b isoform);		Superfamily: Superfamily: Avirulence protein AvrPto
										Family: Serine/threonin kinases		PDBTitle: organization of the sh3-sh2 unit in active and inactive forms of the2 c-abl tyrosine kinase		Family: Family: Avirulence protein AvrPto
74	contig01986	PUF74	Hypothetical	1278	305	Armadillo/beta-catenin-like repeats	7.93e-05	non-SMC mitotic condensation complex subunit 1	5.2e-06	Fold: alpha-alpha superhelix	4.18e-07	Fold:alpha-alpha superhelix	99.9%; 92%	Fold: Fold: alpha-alpha superhelix	0.0001
										Superfamily: ARM repeat		Superfamily:ARM repeat		Superfamily: ARM repeat
										Family: HAT repeat		Family:HEAT repeat		Fold: Armadillo repeat
75	contig01990	PUF75	Hypothetical	1242	355	Domain of unknown function (DUF4208)	5.89e-24	Domain of unknown function (DUF4208)	1.6e-21	not in SCOP 1.53		PDB header:hydrolase	99.9%; 17%	Fold: Dimerisation interlock	0.089
												Chain: X: PDB Molecule:chromo domain-containing protein 1;		Superfamily: SinR repressor dimerisation domain-like
												PDBTitle: dna-binding domain from saccharomyces cerevisiae chromatin-2 remodelling protein chd1		Family: SinR repressor dimerisation domain-like
76	contig02014	PUF76	Hypothetical	759	No predictions
77	contig02069	PUF77	Hypothetical	707	181	No hits		No hits		Fold: Spectrin repeat-like	1.54	PDB header:cell invasion	34.4%; 15%	Fold: Fold: Spectrin repeat-like	0.104
										Superfamily: Spectrin like		Chain: A: PDB Molecule:invasin ipab;		Superfamily: Fold: Spectrin repeat
										Family: Spectrin like		PDBTitle: crystal structure of n-terminal region of type iii secretion first2 translocator ipab (residues 74-224)		Family: Fold: Spectrin repeat
78	contig02163	PUF78	Hypothetical	1093	282	CCT motif	3.88e-20	CCT motif	2.6e-18	Photosynthetic reaction centre	1.8	PDB header:virus/dna	28.1%; 6%	Fold: FAD-binding/transporter-associated domain-like	0.04
												Chain: A: PDB Molecule:capsid protein vp1;		Superfamily: FAD-binding/transporter-associated domain-like
												PDBTitle: structural characterization of h-1 parvovirus: comparison of2 infectious virions to replication defective particles		Family: Uridine diphospho-N-Acetylenolpyruvylglucosamine reductase (MurB), N-terminal domain
79	contig02168	PUF79	Hypothetical	696	193	Stage V sporulation protein B	0.00523	No hits		Fold: EF Hand-like	0.132	Fold:Single transmembrane helix	38.9%, 11%	Fold: DNA/RNA-binding 3-helical bundle	0.177
										Superfamily: Cloroperoxidase		Superfamily:Photosystem II reaction centre subunit H, transmembrane region		Superfamily: Superfamily: Homeodomain-like
										Family: Cloroperoxidase		Family:Photosystem II reaction centre subunit H, transmembrane region		Family: Tetracyclin repressor-like, N-terminal domain
80	contig02229	PUF80	Hypothetical	1139	333	Acidic N-terminal SPT6	2.18e-06	No hits		Transcription/dna.	0.0257	Fold:alpha-alpha superhelix	1.3%; 2%	Fold: Connexin43	0.056
						Pre-mRNA-splicing factor 38-associated hydrophilic C-term	3.16e-06					Superfamily:Hypothetical protein ST1625		Superfamily: Connexin43
												Family:Hypothetical protein ST1625		Family: Connexin43
81	contig02310	PUF81	Hypothetical	918	305	MAC/Perforin domain	4.98e-36	MAC/Perforin domain	8.9e-34	Translation	1.5	PDB header:immune system	100%; 98%	Fold: DNA clamp	0.148
												Chain: A: PDB Molecule:perforin-1;		Superfamily: DNA clamp
												PDBTitle: the x-ray crystal structure of lymphocyte perforin		Family: DNA polymerase processivity factor
82	contig02336	PUF82	Hypothetical	677	155	S1_like: Ribosomal protein S1-like RNA-binding domain	1.95e-11	No hits		Fold: Multiheme cytochromes	1.06	PDB header:hydrolase	84.1%; 34%	Fold: Fold: YjbQ-like	0.388
										Superfamily: Multiheme cytochromes		Chain: L: PDB Molecule:ribonuclease e;		Superfamily: Fold: YjbQ-like
										Family: Di-heme elbow motif		PDBTitle: catalytic domain of e. coli rnase e		Family: Fold: YjbQ-like
83	contig02443	PUF83	Hypothetical	892	225	Skp1 family, tetramerization domain	1.79e-21	Skp1 family, tetramerisation domain	2.4e-23	not in SCOP 1.53		PDB header:transcription	44.4%; 15%	Fold: Spectrin repeat-like	0.033
												Chain: A: PDB Molecule:rcd1 required for cell differentiation1 homolog;		Superfamily: Spectrin repeat
												PDBTitle: crystal structure analysis of human rcd-1 conserved region		Family: Spectrin repeat
84	contig02598	PUF84	Hypothetical	1219	347	Thiamine pyrophosphate (TPP) family	1.67e-151	Dehydrogenase E1 component	4.7e-98	Fold: Thiamin diphosphate-binding fold (THDP-binding)	1.92e-06	Fold:Thiamin diphosphate-binding fold (THDP-binding)	100%; 95%	Fold:Thiamin diphosphate-binding fold (THDP-binding)	4e-14
										Superfamily: Thiamin diphosphate-binding fold (THDP-binding)		Superfamily:Thiamin diphosphate-binding fold (THDP-binding)		Superfamily:Thiamin diphosphate-binding fold (THDP-binding)
										Family: Branched-chain alpha-keto acid dehydrogenase		Family:Branched-chain alpha-keto acid dehydrogenase PP module		Family: Branched-chain alpha-keto acid dehydrogenase Pyr module
85	contig02665	PUF85	Hypothetical	619	100	CBS domain	4.21e-18	CBS domain	5.4e-18	Fold: CBS-domain	0.0595	PDB header:hydrolase	99.5%; 65%	Fold: CBS-domain pair	0.002
										Superfamily: CBS-domain		Chain: B: PDB Molecule:probable manganase-dependent inorganic		Superfamily: CBS-domain pair
										Family: CBS-domain		PDBTitle: crystal structure of the cbs and drtgg domains of the2 regulatory region of clostridium perfringens3 pyrophosphatase complexed with the inhibitor, amp		Family: CBS-domain pair
86	contig02698	PUF86	Hypothetical	814	240	No hits		No hits		Fold: Prealbumin-like	1.25	PDB header:ribosome	33.7%; 26%	Fold: DNA/RNA-binding 3-helical bundle	0.159
										Superfamily: Transthyretin		Chain: I: PDB Molecule:ribosomal protein s9;		Superfamily: "Winged helix" DNA-binding domain
										Family: homol. to d1etb1_		PDBTitle: homology model for the spinach chloroplast 30s subunit fitted to 9.4a2 cryo-em map of the 70s chlororibosome.		Family: N-terminal domain of Bacillus PurR
87	contig02859	PUF87	Hypothetical	1498	421	Domain of unknown function (DUF239)	1.47e-133	Domain of unknown function (DUF4409)	8.4e-49	Fold: 6-bladed beta-propeller	0.263	Fold:SH3-like barrel	46.1%; 7%	Fold: gamma-Crystallin-like	0.099
						Domain of unknown function (DUF4409	1.47e-133	Domain of unknown function (DUF239)	3.4e-93	Superfamily: Sialidases (neuraminidases)		Superfamily:SH3-domain		Superfamily: gamma-Crystallin-like
										Family: Sialidases (neuraminidases)		Family:SH3-domain		Family: Crystallins/Ca-binding development proteins
88	contig02872	PUF88	Hypothetical	562	171	Retinoblastoma-associated protein B domain	1.93e-63	Retinoblastoma-associated protein B doma	1.2e-49	Fold:Cyclin-like	5.18e-06	Fold:Cyclin-like	100%; 77%	Fold: Cyclin-like	1e-06
										Superfamily:Cyclin-like		Superfamily:Cyclin-like		Superfamily: Cyclin-like
										Family:Retinoblastoma tumor suppressor domains		Family:Retinoblastoma tumor suppressor domains		Family: Retinoblastoma tumor suppressor domains
89	contig03039	PUF89	Hypothetical	750	226	No hits		No hits		Fold: TBP-like	0.185	PDB header:unknown function	34.2%; 4%	Fold: SAM domain-like	0.069
										Superfamily ;Bet v1-like		Chain: A: PDB Molecule:prion-like protein doppel;		Superfamily: DNA polymerase beta, N-terminal domain-like
										Family: Major birch pollen allergen Bet v 1		PDBTitle: ovine doppel signal peptide (1-30)		Family: DNA polymerase beta, N-terminal domain-like
90	contig03421	PUF90	Hypothetical	551	177	Outer membrane efflux protein	0.000112	Weak chloroplast movement under blue light	2.8e-46	Lipid transport.	1.5	PDB header:signaling protein/transferase/inhibitor	97.6%; 88%	Fold: Parallel coiled-coil	0.002
												Chain: B: PDB Molecule:phosphatidylinositol 3-kinase regulatory subunit alpha;		Superfamily: Myosin rod fragments
												PDBTitle: crystal structure of p110alpha complexed with nish2 of p85alpha		Family: Myosin rod fragment
91	contig03453	PUF91	Hypothetical	700	232	Phosphoglucomutase 1	1.22e-89	Phosphoglucomutase/phosphomannomutase	4.6e-32	Fold: Phosphoglucomutase, first 3 domains	6.88e-06	Fold:Phosphoglucomutase, first 3 domains	100%; 58%	Fold: Phosphoglucomutase, first 3 domains	9e-06
										Superfamily: Phosphoglucomutase, first 3 domains		Superfamily:Phosphoglucomutase, first 3 domains		Superfamily: Phosphoglucomutase, first 3 domains
										family: Phosphoglucomutase, first 3 domains		Family:Phosphoglucomutase, first 3 domains		Family: Phosphoglucomutase, first 3 domains
92	contig03813	PUF92	Hypothetical	796	240	No hits		No hits		Fold: P-loop containing nucleotide triphosphate hydrolases	0.239	PDB header:signaling protein	41.5%; 18%	Fold: Double-stranded beta-helix	0.136
										Superfamily: P-loop containing nucleotide triphosphate hydrolases		Chain: B: PDB Molecule:senescence-associated carboxylesterase 101;		Superfamily: RmlC-like cupins
										Family: homol. to d1egaa1		PDBTitle: structure of the central plant immunity signaling node eds1 in complex2 with its interaction partner sag101		Family: YML079-like
93	contig04258	PUF93	Hypothetical	514	160	Domain of unknown function (DUF4603)	0.00181	No hits		not in SCOP 1.53		PDB header:membrane protein	11.2%;12%	Fold: Triple-stranded beta-helix	0.361
												Chain: S: PDB Molecule:sherp;		Superfamily: Phage fibre proteins
												PDBTitle: structural basis of molecular recognition by sherp at membrane2 surfaces		Family: HylP-like
94	contig04442	PUF94	Hypothetical	2522	744	WD40-like Beta Propeller Repeat	0.000733	WD40-like Beta Propeller Repeat	0.00048	not in SCOP 1.53		PDB header:protein binding	100%; 47%	Fold: 6-bladed beta-propeller	0.0003
												Chain: D: PDB Molecule:coronatine-insensitive protein 1;		Superfamily: TolB, C-terminal domain
												PDBTitle: structure of coi1-ask1 in complex with ja-isoleucine and the jaz12 degron		Family: TolB, C-terminal domain
95	contig04444	PUF95	Hypothetical	2508	402	Nucellins	6.12e-136	Xylanase inhibitor N-terminal	1.5e-29	Fold: Acid proteases	0.000511	PDB header:plant protein	100%; 91%	Fold: Acid proteases	2e-06
										Superfamily: Acid proteases		Chain: A: PDB Molecule:edgp;		Superfamily: Acid proteases
										Family: Pepsin-like		PDBTitle: crystal structure of edgp		Family: Pepsin-like
96	contig04469	PUF96	Hypothetical	2412	654	SART-1 family	3.12e-61	SART-1 family	3.3e-20	PDB header: replication.	0.0181	PDB header:oxidoreductase	60.4%; 5%	Fold: Triger factor/SurA peptide-binding domain-like	0.039
						RING-finger (Really Interesting New Gene) domain	0.000913					Chain: B: PDB Molecule:dnaj homolog subfamily c member 10;		Superfamily: Triger factor/SurA peptide-binding domain-like
												PDBTitle: crystal structure of j-trx1 fragment of erdj5		Family: TF C-terminus
9	contig04481	PUF97	Hypothetical	2384	575	Tubulin binding cofactor C	3.33e-32	Tubulin binding cofactor C	1.9e-29	not in SCOP 1.53		PDB header:transduction protein	100%; 26%	Fold: P-loop containing nucleoside triphosphate hydrolases	1e-05
												Chain: A: PDB Molecule:xrp2 protein;		Superfamily: P-loop containing nucleoside triphosphate hydrolases
												PDBTitle: crystal structure of the human retinitis pigmentosa2 protein 2 (rp2)		Family: G proteins
98	contig04518	PUF98	Hypothetical	2254	542	RNA-binding protein of the Puf family	0.000452	No hits		Fold: Viral coat and capsid proteins	0.192	PDB header:ligase	28.2%; 3%	Fold: Immunoglobulin-like beta-sandwich	0.115
										Superfamily: Viral coat and capsid proteins		Chain: B: PDB Molecule:e3 ubiquitin-protein ligase znrf3;		Superfamily: CBD9-like
										Family: Animteinsal virus proteins		PDBTitle: zebrafish znrf3 ectodomain crystal form i		Family: Family 9 carbohydrate-binding module, CBD9
99	contig04536	PUF99	Hypothetical	2196	673	Myb-like DNA-binding domain	0.000158	Myb-like DNA-binding domain	2e-06	Fold: Viral coat and capsid proteins	0.223	PDB header:transcription	86.1%; 7%	Fold: Ferredoxin-like	0.155
										Superfamily: Viral coat and capsid proteins		Chain: C: PDB Molecule:nuclear receptor corepressor 2;		Superfamily: RNA-binding domain, RBD
										Family: Animteinsal virus proteins		PDBTitle: structure of hdac3 bound to corepressor and inositol tetraphosphate		Family: Canonical RBD
100	contig04717	PUF100	Hypothetical	1957	429	The Major Facilitator Superfamily	1.08e-25	Major Facilitator Superfamily	1.4e-14	Fold: membrane protein.	0.00906	PDB header:transport protein, membrane protein	100%; 91%	Fold: MFS general substrate transporter	2e-06
										Superfamily: glycerol-3-phosphate transporter		Chain: B: PDB Molecule:bicyclomycin resistance protein tcab;		Superfamily: MFS general substrate transporter
												PDBTitle: the inward-facing structure of the glucose transporter from2 staphylococcus epidermidis		Family: Glycerol-3-phosphate transporter
101	contig04816	PUF101	Hypothetical	1845	518	No hits		No hits		not in SCOP 1.53		Fold:ATPase domain of HSP90 chaperone/DNA topoisomerase II/histidine kinase	68.2%; 7%	Fold: Leucine-rich repeat, LRR (right-handed beta-alpha superhelix)	0.185
												Superfamily:ATPase domain of HSP90 chaperone/DNA topoisomerase II/histidine kinase		Superfamily: L domain-like
												Family:DNA gyrase/MutL, N-terminal domain		Family: Ngr ectodomain-like
102	contig04827	PUF102	Hypothetical	1832	549	Protein of unknown function (DUF1423)	9.28e-11	Protein of unknown function (DUF1423)	8.8e-07	PDB header: cell adhesion protein.	1.75e-07	Fold:Immunoglobulin-like beta-sandwich	98.6%; 15%	Fold: Immunoglobulin-like beta-sandwich	0.032
										Chain:A;: PDB Molecule:fibronectin		Superfamily:Fibronectin type III		Superfamily: Fibronectin type III
										PDBTitle: fragment of human fibronectin encompassing type-iii repeats2 7 through 10		Family:Fibronectin type III		Family: Fibronectin type III
103	contig04834	PUF103	Hypothetical	1831	459	Vacuolar sorting protein 39 domain 1	2.11e-27	Vacuolar sorting protein 39 domain 1	3.2e-25	PDB header: hydrolase.	0.353	PDB header:clathrin	99.5%; 58%	Fold: alpha-alpha superhelix	0.001
						Region in Clathrin and VPS	2.38e-05	Region in Clathrin and VPS	4.8e-08	Chain: A: PDB Molecule:vacuolar atp synthase subunit h		Chain: A: PDB Molecule:protein (clathrin heavy chain);		Superfamily: ARM repeat
								Vacuolar sorting protein 39 domain 2	2.1e-15			PDBTitle: clathrin heavy chain proximal leg segment (bovine)		Family: Clathrin heavy chain proximal leg segment
104	contig04840	PUF104	Hypothetical	1823	569	Histone deacetylase complex, SIN3 component	1.27e-10	No hits		PDB header:hydrolase	0.214	PDB header:transport protein/dna binding protein	85.7%; 11%	Fold: GINS helical bundle-like	0.119
										Chain: A: PDB Molecule:angiostatin		Chain: C: PDB Molecule:enhancer of yellow 2 transcription factor homolog;		Superfamily: GINS helical bundle-like
												PDBTitle: eny2:ganp complex		Family: PSF1 N-terminal domain-like
105	contig04864	PUF105	Hypothetical	1805	431	Protein of unknown function (DUF1005)	0	Protein of unknown function (DUF1005)	1.4e-189	not in SCOP 1.53	0.0704	Fold:C2 domain-like	81.6%; 22%	Fold: Ribonuclease H-like motif	0.13
												Superfamily:C2 domain (Calcium/lipid-binding domain, CaLB)		Superfamily: Actin-like ATPase domain
												Family:PLC-like (P variant)		Family: BadF/BadG/BcrA/BcrD-like
106	contig04880	PUF106	Hypothetical	1793	303	Protein of unknown function (DUF581)	2.12e-19	Protein of unknown function (DUF581)	5.1e-21	not in SCOP 1.53	0.154	Fold:Glucocorticoid receptor-like (DNA-binding domain)	86.3%; 10%	Fold: Immunoglobulin-like beta-sandwich	0.153
												Superfamily:Glucocorticoid receptor-like (DNA-binding domain)		Superfamily: Immunoglobulin
												Family:TRASH domain		Family: C2 set domains
107	contig04885	PUF107	Hypothetical	1796	500	Pleckstrin homology (PH) domain	9.12e-09	PH domain	2.6e-07	PDB header: lipid-binding protein	0.0171	PDB header:transmembrane protein	98.4%; 77%	Fold: PH domain-like barrel	0.0006
										Chain: A: PDB Molecule:tandem ph domain containing protein-1		Chain: A: PDB Molecule:colicin ia;		Superfamily: PH domain-like
												PDBTitle: colicin ia		Family: Pleckstrin-homology domain (PH domain)
108	contig04929	PUF108	Hypothetical	1751	463	flagellar assembly protein H	0.000596	No hits		PDB header: replication	0.147	PDB header:membrane protein	65.3%; 7%	Fold: Parallel coiled-coil	0.015
												Chain: A: PDB Molecule:selenoprotein s;		Superfamily: Myosin rod fragments
												PDBTitle: structure of the human selenoprotein s (vcp-interacting membrane2 protein)		Family: Myosin rod fragments
109	contig04956	PUF109	Hypothetical	1712	458	Plant mobile domain	1.43e-96	Plant mobile domain	2.1e-90	Not in SOP 1.53		Fold:Nucleotidyltransferase	2.9%; 9%	Fold: C2 domain-like	0.115
												Superfamily:Nucleotidyltransferase		Superfamily: C2 domain (Calcium/lipid-binding domain, CaLB)
												Family:RNA editing terminal uridyl transferase 2, RET2, catalytic domain		Family: PLC-like (P variant)
110	contig04977	PUF110	Hypothetical	1722	420	Heat shock chaperonin-binding motif	0.00178	No hits		not in SCOP 1.53		PDB header:protein transport	99.8%; 18%	Fold: RuvA C-terminal domain-like	0.118
												Chain: A: PDB Molecule:protein tic 40, chloroplastic;		Superfamily: Hypothetical protein AF0491, middle domain
												PDBTitle: solution structure of the c-terminal np-repeat domain of tic40, a co-2 chaperone during protein import into chloroplasts		Family: Hypothetical protein AF0491, middle domain
111	contig00200	PUF111	Uncharacterized	500	157	ACT domains	0.00647	No hits		Fold: Helix-loop-helix DNA-binding domain	0.0154	Fold:HLH-like	99.2%; 36%	Fold: UDP-Glycosyltransferase/glycogen phosphorylase	0.083
										Superfamily: Helix-loop-helix DNA-binding domain		Superfamily:HLH, helix-loop-helix DNA-binding domain		Superfamily: UDP-Glycosyltransferase/glycogen phosphorylase
										Family: Helix-loop-helix DNA-binding domain		Family:HLH, helix-loop-helix DNA-binding domain		Family: Glycosyl transferases group 1
112	contig00243	PUF112	Uncharacterized	500	No predictions
113	contig00467	PUF113	Uncharacterized	808	209	Late embryogenesis abundant protein	1.21e-10	Late embryogenesis abundant protein	2.4e-11	Fold: ConA-like lectins/glucanases	3.54	Fold:Immunoglobulin-like beta-sandwich	98.2%; 63%	Fold: Single-stranded right-handed beta-helix	0.071
										Superfamily :ConA-like lectins/glucanases		Superfamily:LEA14-like		Superfamily: Pectin lyase-like
										Family: Galectin (animal S-lectin)		Family:LEA14-like		Family: Pectin methylesterase
114	contig00501	PUF114	Uncharacterized	1031	180	gall11 coactivator domain	4.26e-15	No hits		Fold: Membrane all-alpha	3.3	Fold:Immunoglobulin-like beta-sandwich	10.5%; 15%	Fold: ComB-like	0.004
						gall11 coactivator domain	2.97e-13			Superfamily: Membrane all-alpha		Superfamily:beta-Galactosidase/glucuronidase domain		Superfamily: ComB-like
						Domain of unknown function (DUF1720)	2.31e-05			Family: Membrane all-alpha		Family:beta-Galactosidase/glucuronidase domain		Family: Comb-like
115	contig00582	PUF115	Uncharacterized	539	No predictions
116	contig00638	PUF116	Uncharacterized	560	133	Malonyl-_O-methyltransferase	0.00114	No hits		PDB header: hydrolase	1.94	PDB header:transferase	97.7%; 87%	Fold: Signal peptide-binding domain	0.193
												Chain: B: PDB Molecule:cyclopropane-fatty-acyl-phospholipid synthase;		Superfamily: Signal peptide-binding domain
												PDBTitle: crystal structure of putative methyltransferase (yp_321342.1) from2 anabaena variabilis atcc 29413 at 1.90 a resolution		Family: Signal peptide-binding domain
117	contig00917	PUF117	Uncharacterized	613	127	Ribosomal prote3.93e-61in S9/S16		Ribosomal protein S9/S16	7.8e-18	Fold: Ribosomal protein S5 domain 2-like	4.85	PDB header:ribosome	100%; 76%	Fold: DNA/RNA-binding 3-helical bundle	0.012
										Superfamily: Ribosomal protein S5 domain 2-like		Chain: I: PDB Molecule:rps16e;		Superfamily: Ribosomal protein S18
										Family: Translational machinery components		PDBTitle: crystal structure of the eukaryotic 40s ribosomal2 subunit in complex with initiation factor 1. this file3 contains the 40s subunit and initiation factor for4 molecule 1		Family: Ribosomal protein S18
118	contig00942	PUF118	Uncharacterized	1233	410	Domain of unknown function (DUF4603)	8.79e-08	No hits		PDB header:endocytosis/exocytosis.	0.107	PDB header:chaperone	3.3%; 2%	Fold: P-loop containing nucleoside triphosphate hydrolases	0.012
										Chain: A: PDB Molecule:myc box dependent interacting protein 1		Chain: G: PDB Molecule:prokaryotic ubiquitin-like protein pup;		Superfamily: P-loop containing nucleoside triphosphate hydrolases
												PDBTitle: crystal structure of the prokaryotic ubiquintin-like protein pup2 complexed with the hexameric proteasomal atpase mpa which includes3 the amino terminal coiled coil domain and the inter domain		Family: G proteins
119	contig01190	PUF119	Uncharacterized	1036	316	Zinc finger, 5.52e-11 type (RING finger)		Zinc finger, C3HC4 type (RING finger)	6.9e-09	PDB header: lipid transport	0.385	PDB header:apoptosis	99.9%; 35%	Fold: P-loop containing nucleoside triphosphate hydrolases	0.002
						Heavy-metal resistance	0.000497			Chain: A: PDB Molecule:apolipoprotein a-i;		Chain: A: PDB Molecule:baculoviral iap repeat-containing protein 2;		Superfamily: P-loop containing nucleoside triphosphate hydrolases
						Flagellar FliJ protein	2.76e-06					PDBTitle: iap antagonist-induced conformational change in ciap1 promotes e32 ligase activation via dimerization		Family: G proteins
120	contig01205	PUF120	Uncharacterized	1978	500	Activator of bc1 complex (ABC1) kinases	1.71e-22	ABC1 family	3.4e-05	PDB header: rna binding protein	1.31	PDB header:transferase	100%; 43%	Fold: GckA/TtuD-like	0.002
										Chain: B: PDB Molecule:conserved hypothetical protein;.		Chain: A: PDB Molecule:chaperone activity of bc1 complex-like, mitochondrial;		Superfamily: GckA/TtuD-like
												PDBTitle: mitochondrial adck3 employs an atypical protein kinase-like fold to2 enable coenzyme q biosynthes		Family: GckA/TtuD-like
121	contig01222	PUF121	Uncharacterized	1110	333	Pseudouridine synthases,	1.25e-42	S4 domain	2.5e-11	PDB header: lyase	1.33e-24	PDB header:isomerase/rna	100%; 68%	Fold: Pseudouridine synthase	5e-06
						S4/Hsp/ tRNA synthetase RNA-binding domain	3.54e-10	RNA pseudouridylate synthase	6.2e-17	Chain: A: PDB Molecule:ribosomal small subunit pseudouridine synthase a		Chain: C: PDB Molecule:ribosomal large subunit pseudouridine synthase f;		Superfamily: Pseudouridine synthase
												PDBTitle: crystal structure of rluf in complex with a 22 nucleotide2 rna substrate		Family: Pseudouridine synthase RsuA/RluD
122	contig01234	PUF122	Uncharacterized	718	239	Tetratricopeptide repeat domain	2.12e-08	Tetratricopeptide repeat domain	5.2e-11	Fold: alpha-alpha superhelix	2.24e-08	PDB header:transferase	99.5%; 95%	Fold: alpha-alpha superhelix	0.002
						Protein of unknown function (DUF3493)	2.73e-17	Protein of unknown function (DUF3493)	3.1e-15	Superfamily: Tetratricopeptide repeat (TPR)		Chain: A: PDB Molecule:n-terminal acetyltransferase a complex subunit nat1;		Superfamily: TPR-like
										Family: homol. to d1elra_		PDBTitle: the nata acetyltransferase complex bound to ppgpp		Family: Tetratricopeptide repeat (TPR)
123	contig01406	PUF123	Uncharacterized	702	131	Heme-peroxidases similar to plant peroxidases	4.12e-47	Peroxidase	6.7e-13	Fold: Heme-dependent peroxidases	3.06e-05	Fold:Heme-dependent peroxidases	100%; 96%	Fold: Heme-dependent peroxidases	0.0008
										Superfamily: Heme-dependent peroxidases		Superfamily:Heme-dependent peroxidases		Superfamily: Heme-dependent peroxidases
										Family: homol. to d7atja_		Family:CCP-like		Family: CCP-like
124	contig01408	PUF124	Uncharacterized	700	131	Heme-dependent peroxidases similar to plant peroxidases	4.12e-47	Peroxidase	6.7e-13	Fold: Heme-dependent peroxidases	3.06e-05	Fold:Heme-dependent peroxidases	100%; 96%	Fold: Heme-dependent peroxidases	0.0008
										Superfamily: Heme-dependent peroxidases		Superfamily:Heme-dependent peroxidases		Superfamily: Heme-dependent peroxidases
										Family: homol. to d7atja_		Family:CCP-like		Family: CCP-like
125	contig01644	PUF125	Uncharacterized	1864	485	Dynamin-like protein	1.61e-58	50S ribosome-binding GTPase	1.5e-16	Not in SOP 1.53		PDB header:hydrolase	99.9%; 96%	Fold: P-loop containing nucleoside triphosphate hydrolases	0.014
												Chain: D: PDB Molecule:bacterial dynamin-like protein;		Superfamily: P-loop containing nucleoside triphosphate hydrolases
												PDBTitle: bacterial dynamin-like protein bdlp		Family: G proteins
126	contig01646	PUF126	Uncharacterized	1243	373	TIM_phosphate_binding super family	1.6e-06	No hits		Fold: TIM beta/alpha-barrel	1.07e-11	PDB header:transferase	100%; 45%	Fold: TIM beta/alpha-barrel	0.002
										Superfamily: Thiamin phosphate synthase		Chain: D: PDB Molecule:thiamine biosynthetic bifunctional enzyme;		Superfamily: Thiamin phosphate synthase
										Family: Thiamin phosphate synthase		PDBTitle: the crystal structure of candida glabrata thi6, a bifunctional enzyme2 involved in thiamin biosyhthesis of eukaryotes		Family: Thiamin phosphate synthase
127	contig01648	PUF127	Uncharacterized	2530	754	Sulfite exporter TauE/SafE	0.00135	No hits		PDB header: signal protein	0.714	PDB header:electron transport	61.7%; 1%	Fold: Zinc finger design	0.084
										Chain: A: PDB Molecule:protein (aml-1b)		Chain: B: PDB Molecule:cytochrome c oxidase subunit 2;		Superfamily: Zinc finger design
												PDBTitle: structure of caa3-type cytochrome oxidase		Family: Zinc finger design
128	contig01671	PUF128	Uncharacterized	861	253	Not1 N-terminal domain	6.95e-108	Not1 N-terminal domain, CCR4-Not complex	7.1e-80	PDB header:endocytosis/exocytosis	0.0586	PDB header:gene regulation, chaperone	68.2%; 71%	Fold: immunoglobulin/albumin-binding domain-like	0.011
										Chain: B: PDB Molecule:syntaxin 1a		Chain: A: PDB Molecule:hp0958;		Superfamily: Staphylocoagulase
												PDBTitle: 2.2 angstrom structure of the hp0958 protein from helicobacter pylori2 ccug 17874		Family: Staphylocoagulase
129	contig01710	PUF129	Uncharacterized	2577	858	Peptidase M16 inactive domain	1.63e-11	Insulinase (Peptidase family M16)	2.7e-20	Not picked any hits		PDB header:hydrolase	100%; 83%	Fold: LuxS/MPP-like metallohydrolase	4e-07
						Peptidase M16 inactive domain	8.08e-09	Peptidase M16 inactive domain	3.3e-36			Chain: A: PDB Molecule:protease iii;		Superfamily: LuxS/MPP-like metallohydrolase
								Peptidase M16 inactive domain	2.3e-23			PDBTitle: crystal structure of pitrilysin		Family: MPP-like
130	contig01711	PUF130	Uncharacterized	815	186	Peptidase M16 inactive domain	9.18e-13	Peptidase M16 inactive domain	2.3e-23	PDB header: apoptosis	3.79	Fold:LuxS/MPP-like metallohydrolase	99.9%; 77%	Fold: LuxS/MPP-like metallohydrolase	0.006
										Chain: A: PDB Molecule:astrocytic phosphoprotein pea-15		Superfamily:LuxS/MPP-like metallohydrolase		Superfamily: LuxS/MPP-like metallohydrolase
												Family:MPP-like		Family: MPP-like
The green coloured contigs were experimentally validated
